# Supplementary material for: Both Cerebral and Hematopoietic Deficiencies in CCR2 Result in Uncontrolled Herpes Simplex Virus Infection of the Central Nervous System in Mice
Source: PubMed Central journal article supplement (PMC5145225; doi:10.1371/journal.pone.0168034), 2016-12-08

**WT**

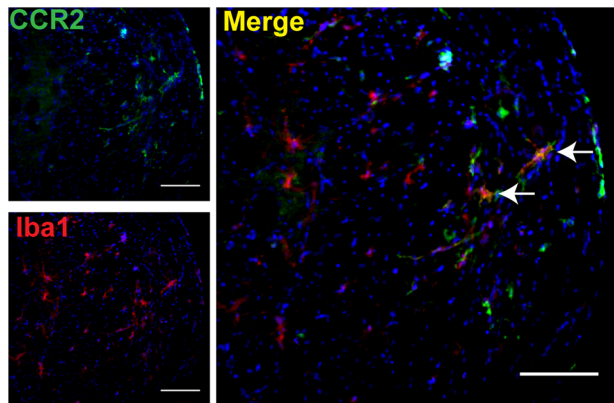

**CCR2<sup>-/-</sup> → WT**

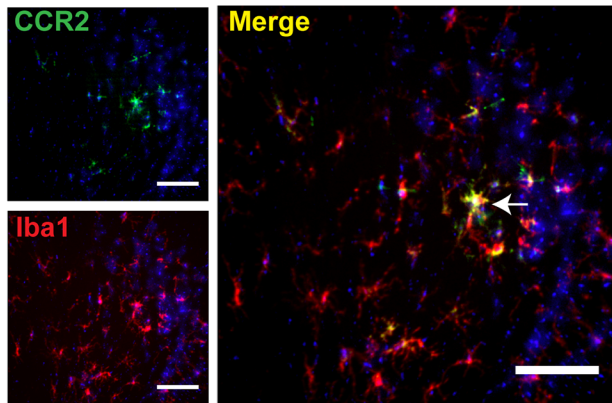

**WT → CCR2<sup>-/-</sup>**

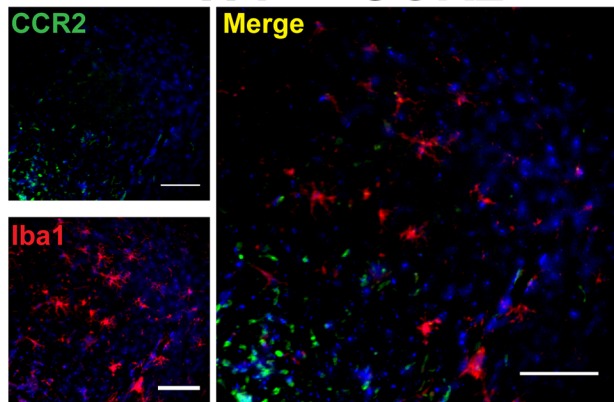

**CCR2<sup>-/-</sup>**

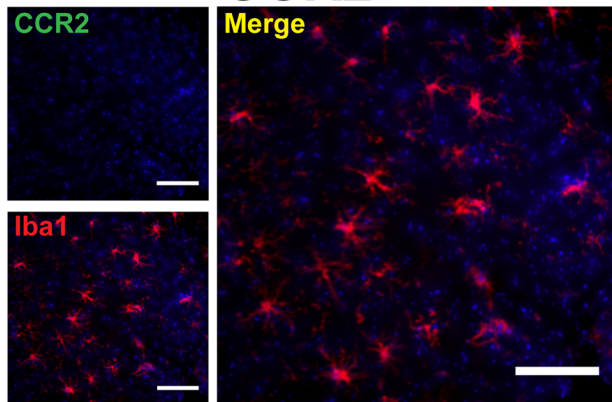

Supplement: pone.0168034.s001.pdf [file pone.0168034.s001.pdf]
